# Supplementary material for: Ribavirin Contributes to Hepatitis C Virus Suppression by Augmenting pDC Activation and Type 1 IFN Production
Source: PubMed Central journal article supplement (PMC4537094; doi:10.1371/journal.pone.0135232), 2015-08-14

S1 Figure

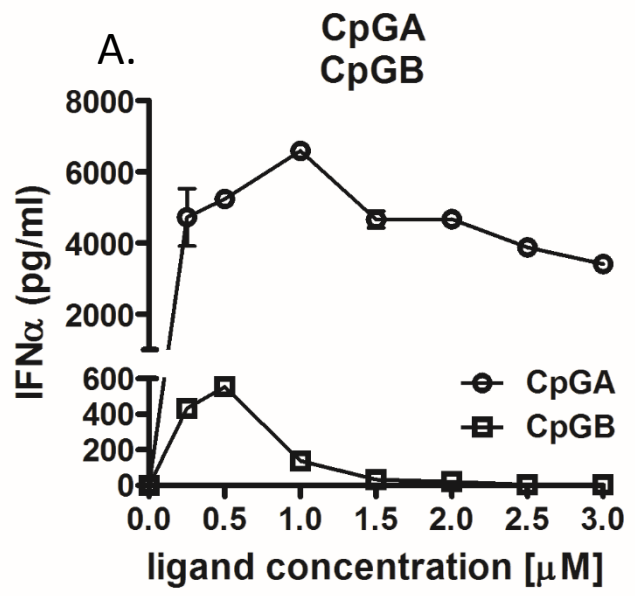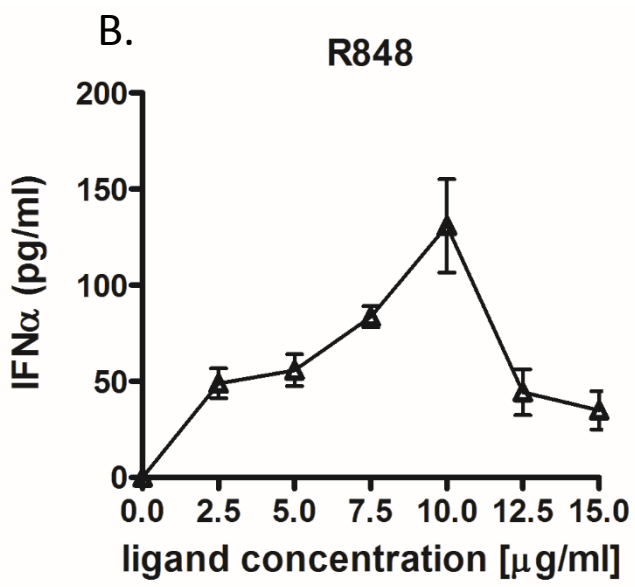

Supplement: pone.0135232.s001.pdf [file pone.0135232.s001.pdf]
